# Supplementary material for: Cytosolic Isocitrate Dehydrogenase from Arabidopsis thaliana Is Regulated by Glutathionylation
Source: MDPI journal article supplement (doi:10.3390/antiox8010016), 2019-01-08
Supplement: s1 [file s1]

**Supplemental Table S1:** Primers used in this study.

| Primer Name   | Primer Sequence                  | Experiment Purpose            |
|---------------|----------------------------------|-------------------------------|
| cICDH-NdeI    | GCCATATGGCGTTTGAGAAGATCAAG       | Cloning cICDH in pET-16b      |
| cICDH-BamH1   | CGGGATCCTTAAGCATTGAGTCTTTCTTTGAG | Cloning cICDH in pET-16b      |
| cICDH-C363S-F | AAGCTGGAAGCCGCTAGTGTGGGACAGTGG   | Point mutation of cICDH-C363S |
| cICDH-C363S-R | CCACTGTCCCAACACTAGCGGCTTCCAGCTT  | Point mutation of cICDH-C363S |
